# Supplementary material for: Enhancing dye degradation using a novel cobalt metal–organic framework as a peroxymonosulfate activator
Source: Royal Society of Chemistry journal article supplement (doi:10.1039/d3dt03707j), 2024-01-01
Supplement: d3dt03707j1.pdf [file d3dt03707j1.pdf]

# Supporting Information

## **Enhancing dye degradation using a novel cobalt metal-organic framework as peroxymonosulfate activator**

*Tuotuo Li,<sup>ab</sup> Ahmed Olalekan Omoniyi,<sup>ab</sup> Yuliang Wang,<sup>ab</sup> Xiaoli Hu<sup>\*ab</sup> and  
Zhongmin Su<sup>\*abc</sup>*

<sup>a</sup>School of Chemistry and Environmental Engineering, Changchun University of  
Science and Technology, Changchun, 130022, China.

<sup>b</sup>Jilin Provincial Science and Technology Innovation Center of Optical Materials and  
Chemistry, Changchun, 130022, China.

<sup>c</sup>Joint Sino-Russian Laboratory of Optical Materials and Chemistry, Changchun  
130022, China.

\* Email: [huxiaoli1113@cust.edu.cn](mailto:huxiaoli1113@cust.edu.cn); [zmsu@nenu.edu.cn](mailto:zmsu@nenu.edu.cn)

## 1. Materials

Cobalt nitrate hexahydrate, Peroxymonosulfate ( $\text{Co}(\text{NO}_3)_2 \cdot 6\text{H}_2\text{O}$ , PMS, Shanghai Aladdin Reagent Co., LTD), 2, 2'-Bipyridine (BIPY, Adamas-beta), 1,3,5-tri(4-carboxyphenyl) benzene (BTB, Jilin Chinese Academy of Sciences -Yanshen Technology Co., LTD), N,N-dimethylacetamide (DMA, Tianjin Fuyu Fine Chemical Co., LTD), Deionized water ( $\text{H}_2\text{O}$ ), Methyl Orange (MO, Tianjin Yongsheng Fine Chemical Co., LTD), Rhodamine B (RhB, Sinopharm Chemical Reagent Co., LTD), Methanol (MeOH, Tianjin Fuyu Fine Chemical Co., LTD), Tert-butanol (TBA, RON), P-benzoquinone, L-histidine (P-BQ, L-His, Shanghai Maclin Biochemical Technology Co., LTD), Sodium hydroxide (NaOH, Fuchen Tianjin Reagent Co., LTD), Hydrochloric acid (HCl, Beijing Chemical Plant), Sodium chloride (NaCl, Tianjin Dingsheng Xin Chemical Co., LTD), Crystalline sodium carbonate ( $\text{Na}_2\text{CO}_3 \cdot 10\text{H}_2\text{O}$ , Shenyang Reagent Factory), Sodium dihydrogen phosphate ( $\text{NaH}_2\text{PO}_4$ , Tianjin Damao Chemical Reagent Factory), Anhydrous sodium sulfate ( $\text{Na}_2\text{SO}_4$ , Tianjin Xintong Fine Chemical Co., LTD), Sodium bicarbonate ( $\text{NaHCO}_3$ , Kaiyuan Chemical Reagent Factory). All reagents were used directly as supplied without further purification.

## 2. Characterization and results

**Table S1.** Crystal data and structure refinement for **CUST-565**

|                                                |                                                                |
|------------------------------------------------|----------------------------------------------------------------|
| Identification code                            | CUST-565                                                       |
| Empirical formula                              | $\text{C}_{74}\text{H}_{46}\text{Co}_3\text{N}_4\text{O}_{12}$ |
| Formula weight                                 | 1359.94                                                        |
| Temperature/K                                  | 294.83                                                         |
| Crystal system                                 | monoclinic                                                     |
| Space group                                    | C2/c                                                           |
| a/Å                                            | 27.505(10)                                                     |
| b/Å                                            | 17.871(6)                                                      |
| c/Å                                            | 16.149(5)                                                      |
| $\alpha/^\circ$                                | 90                                                             |
| $\beta/^\circ$                                 | 93.474(13)                                                     |
| $\gamma/^\circ$                                | 90                                                             |
| Volume/Å <sup>3</sup>                          | 7924(5)                                                        |
| Z                                              | 4                                                              |
| $\rho_{\text{calc}}/\text{cm}^3$               | 1.140                                                          |
| $\mu/\text{mm}^{-1}$                           | 0.675                                                          |
| F (000)                                        | 2780.0                                                         |
| Crystal size/mm <sup>3</sup>                   | 0.24 × 0.22 × 0.2                                              |
| Radiation                                      | Mo K $\alpha$ ( $\lambda = 0.71073$ )                          |
| 2 $\Theta$ range for data collection/ $^\circ$ | 5 to 50.092                                                    |
| Index ranges                                   | $-32 \leq h \leq 32, -21 \leq k \leq 21, -19 \leq l \leq 19$   |

|                                             |                                       |
|---------------------------------------------|---------------------------------------|
| Reflections collected                       | 49227                                 |
| Independent reflections                     | 6980 [Rint = 0.0520, Rsigma = 0.0279] |
| Data/restraints/parameters                  | 6980/0/421                            |
| Goodness-of-fit on F <sup>2</sup>           | 1.041                                 |
| Final R indexes [I>>=2σ (I)]                | R1 = 0.0381, wR2 = 0.1125             |
| Final R indexes [all data]                  | R1 = 0.0504, wR2 = 0.1199             |
| Largest diff. peak/hole / e Å <sup>-3</sup> | 0.24/-0.38                            |

$$wR_1 = \frac{\sum ||F_o| - |F_c||}{\sum |F_o|} \quad wR_2 = \frac{\{\sum [w(F_o^2 - F_c^2)^2]\}}{\sum [w(F_o^2)^2]}^{1/2}$$

**Table S2.** Bond Lengths for **CUST-565**.

| Atom | Atom            | Length/Å   | Atom | Atom | Length/Å |
|------|-----------------|------------|------|------|----------|
| Co1  | O1 <sup>1</sup> | 2.2026(18) | C7   | C23  | 1.382(4) |
| Co1  | O1 <sup>2</sup> | 2.2026(18) | C7   | C26  | 1.381(4) |
| Co1  | O3              | 2.0498(18) | C8   | C12  | 1.403(4) |
| Co1  | O3 <sup>3</sup> | 2.0498(18) | C8   | C16  | 1.490(3) |
| Co1  | O6 <sup>4</sup> | 2.029(2)   | C9   | C12  | 1.382(4) |
| Co1  | O6 <sup>5</sup> | 2.0293(19) | C10  | C13  | 1.388(4) |
| Co2  | O1 <sup>6</sup> | 2.1696(18) | C10  | C18  | 1.397(4) |
| Co2  | O2 <sup>7</sup> | 2.0405(18) | C11  | C15  | 1.490(4) |
| Co2  | O4 <sup>6</sup> | 2.248(2)   | C11  | C17  | 1.384(4) |
| Co2  | O5              | 2.047(2)   | C11  | C22  | 1.393(4) |
| Co2  | N1              | 2.116(2)   | C13  | C16  | 1.396(4) |
| Co2  | N2              | 2.160(2)   | C14  | C24  | 1.489(4) |
| O1   | C15             | 1.281(3)   | C14  | C33  | 1.393(4) |
| O2   | C2              | 1.260(3)   | C16  | C28  | 1.400(4) |
| O3   | C2              | 1.249(3)   | C17  | C29  | 1.386(4) |
| O4   | C15             | 1.248(3)   | C18  | C21  | 1.391(4) |
| O5   | C6              | 1.261(3)   | C19  | C26  | 1.384(4) |
| O6   | C6              | 1.237(3)   | C20  | C32  | 1.372(4) |
| N1   | C20             | 1.337(3)   | C21  | C28  | 1.389(4) |
| N1   | C24             | 1.351(3)   | C21  | C30  | 1.496(4) |
| N2   | C14             | 1.340(4)   | C22  | C27  | 1.391(4) |
| N2   | C31             | 1.346(4)   | C23  | C25  | 1.388(4) |
| C1   | C2              | 1.507(3)   | C24  | C36  | 1.374(4) |
| C1   | C3              | 1.392(4)   | C27  | C30  | 1.387(4) |
| C1   | C9              | 1.388(4)   | C29  | C30  | 1.398(4) |
| C3   | C5              | 1.382(3)   | C31  | C34  | 1.388(5) |
| C4   | C6              | 1.510(3)   | C32  | C37  | 1.365(5) |
| C4   | C19             | 1.379(4)   | C33  | C35  | 1.378(5) |
| C4   | C25             | 1.376(4)   | C34  | C35  | 1.362(5) |
| C5   | C8              | 1.393(4)   | C36  | C37  | 1.379(5) |
| C7   | C10             | 1.493(4)   |      |      |          |

<sup>1</sup>1-X,+Y,1/2-Z;<sup>2</sup>-1/2+X,1/2-Y,-1/2+Z;<sup>3</sup>1/2-X,1/2-Y,-Z;<sup>4</sup>+X,+Y,-1+Z;<sup>5</sup>1/2-X,1/2-Y,1-Z;<sup>6</sup>-1/2+X,1/2-Y,1/2+Z;<sup>7</sup>+X,+Y,1+Z

**Table S3.** Bond Angles for **CUST-565**.

| Atom             | Atom | Atom             | Angle/°    | Atom | Atom | Atom | Angle/°  |
|------------------|------|------------------|------------|------|------|------|----------|
| O1 <sup>1</sup>  | Co1  | O1 <sup>2</sup>  | 180.00(12) | O5   | C6   | C4   | 118.4(2) |
| O3 <sup>3</sup>  | Co1  | O1 <sup>2</sup>  | 93.10(7)   | O6   | C6   | O5   | 125.5(2) |
| O3               | Co1  | O1 <sup>1</sup>  | 93.10(7)   | O6   | C6   | C4   | 116.1(2) |
| O3               | Co1  | O1 <sup>2</sup>  | 86.90(7)   | C23  | C7   | C10  | 122.8(3) |
| O3 <sup>3</sup>  | Co1  | O1 <sup>1</sup>  | 86.90(7)   | C26  | C7   | C10  | 119.3(3) |
| O3               | Co1  | O3 <sup>3</sup>  | 180.0      | C26  | C7   | C23  | 117.8(3) |
| O6 <sup>4</sup>  | Co1  | O1 <sup>2</sup>  | 90.86(8)   | C5   | C8   | C12  | 117.7(2) |
| O6 <sup>5</sup>  | Co1  | O1 <sup>1</sup>  | 90.86(8)   | C5   | C8   | C16  | 122.7(2) |
| O6 <sup>4</sup>  | Co1  | O1 <sup>1</sup>  | 89.14(8)   | C12  | C8   | C16  | 119.6(2) |
| O6 <sup>5</sup>  | Co1  | O1 <sup>2</sup>  | 89.14(8)   | C12  | C9   | C1   | 121.4(3) |
| O6 <sup>5</sup>  | Co1  | O3               | 88.16(9)   | C13  | C10  | C7   | 120.1(2) |
| O6 <sup>4</sup>  | Co1  | O3 <sup>3</sup>  | 88.16(9)   | C13  | C10  | C18  | 119.1(2) |
| O6 <sup>5</sup>  | Co1  | O3 <sup>3</sup>  | 91.84(9)   | C18  | C10  | C7   | 120.6(2) |
| O6 <sup>4</sup>  | Co1  | O3               | 91.84(9)   | C17  | C11  | C15  | 121.0(2) |
| O6 <sup>5</sup>  | Co1  | O6 <sup>4</sup>  | 180.00(15) | C17  | C11  | C22  | 119.1(2) |
| O1 <sup>6</sup>  | Co2  | O4 <sup>6</sup>  | 59.36(7)   | C22  | C11  | C15  | 119.9(2) |
| O2 <sup>7</sup>  | Co2  | O1 <sup>6</sup>  | 98.87(7)   | C9   | C12  | C8   | 120.6(3) |
| O2 <sup>7</sup>  | Co2  | O4 <sup>6</sup>  | 91.07(8)   | C10  | C13  | C16  | 121.2(2) |
| O2 <sup>7</sup>  | Co2  | O5               | 101.03(8)  | N2   | C14  | C24  | 115.1(2) |
| O2 <sup>7</sup>  | Co2  | N1               | 93.69(8)   | N2   | C14  | C33  | 121.5(3) |
| O2 <sup>7</sup>  | Co2  | N2               | 169.66(8)  | C33  | C14  | C24  | 123.4(3) |
| O5               | Co2  | O1 <sup>6</sup>  | 102.05(8)  | O1   | C15  | C11  | 120.4(2) |
| O5               | Co2  | O4 <sup>6</sup>  | 159.50(8)  | O4   | C15  | O1   | 119.8(2) |
| O5               | Co2  | N1               | 109.29(8)  | O4   | C15  | C11  | 119.8(2) |
| O5               | Co2  | N2               | 83.96(9)   | C13  | C16  | C8   | 121.3(2) |
| N1               | Co2  | O1 <sup>6</sup>  | 143.20(8)  | C13  | C16  | C28  | 118.5(2) |
| N1               | Co2  | O4 <sup>6</sup>  | 86.10(8)   | C28  | C16  | C8   | 120.1(2) |
| N1               | Co2  | N2               | 76.06(9)   | C11  | C17  | C29  | 120.6(3) |
| N2               | Co2  | O16              | 88.82(8)   | C21  | C18  | C10  | 121.0(2) |
| N2               | Co2  | O46              | 86.89(8)   | C4   | C19  | C26  | 121.0(3) |
| Co2 <sup>8</sup> | O1   | Co1 <sup>2</sup> | 106.19(8)  | N1   | C20  | C32  | 123.2(3) |
| C15              | O1   | Co1 <sup>2</sup> | 134.41(16) | C18  | C21  | C30  | 120.6(2) |
| C15              | O1   | Co2 <sup>8</sup> | 91.73(15)  | C28  | C21  | C18  | 119.0(3) |
| C2               | O2   | Co2 <sup>4</sup> | 130.41(16) | C28  | C21  | C30  | 120.4(2) |
| C2               | O3   | Co1              | 138.02(17) | C27  | C22  | C11  | 120.2(3) |
| C15              | O4   | Co2 <sup>8</sup> | 89.01(15)  | C7   | C23  | C25  | 120.9(3) |
| C6               | O5   | Co2              | 121.70(17) | N1   | C24  | C14  | 114.6(2) |
| C6               | O6   | Co17             | 147.01(19) | N1   | C24  | C36  | 121.2(3) |
| C20              | N1   | Co2              | 123.58(18) | C36  | C24  | C14  | 124.2(3) |
| C20              | N1   | C24              | 118.0(2)   | C4   | C25  | C23  | 121.0(3) |
| C24              | N1   | Co2              | 116.55(18) | C7   | C26  | C19  | 121.1(3) |
| C14              | N2   | Co2              | 115.83(18) | C30  | C27  | C22  | 120.8(3) |

|     |    |     |          |     |     |     |          |
|-----|----|-----|----------|-----|-----|-----|----------|
| C14 | N2 | C31 | 118.8(2) | C21 | C28 | C16 | 121.3(2) |
| C31 | N2 | Co2 | 125.1(2) | C17 | C29 | C30 | 120.6(3) |
| C3  | C1 | C2  | 122.1(2) | C27 | C30 | C21 | 120.4(3) |
| C9  | C1 | C2  | 119.9(2) | C27 | C30 | C29 | 118.6(3) |
| C9  | C1 | C3  | 118.0(2) | C29 | C30 | C21 | 121.0(3) |
| O2  | C2 | C1  | 117.2(2) | N2  | C31 | C34 | 122.0(3) |
| O3  | C2 | O2  | 126.8(2) | C37 | C32 | C20 | 118.6(3) |
| O3  | C2 | C1  | 116.0(2) | C35 | C33 | C14 | 119.0(3) |
| C5  | C3 | C1  | 120.9(2) | C35 | C34 | C31 | 119.1(3) |
| C19 | C4 | C6  | 119.3(2) | C34 | C35 | C33 | 119.6(3) |
| C25 | C4 | C6  | 122.5(2) | C24 | C36 | C37 | 119.8(3) |
| C25 | C4 | C19 | 118.1(2) | C32 | C37 | C36 | 119.0(3) |
| C3  | C5 | C8  | 121.3(2) |     |     |     |          |

<sup>1</sup>-1/2+X,1/2-Y,-1/2+Z;<sup>2</sup>1-X,+Y,1/2-Z;<sup>3</sup>1/2-X,1/2-Y,-Z;<sup>4</sup>+X,+Y,-1+Z;<sup>5</sup>1/2-X,1/2-Y,1-Z;<sup>6</sup>-1/2+X,1/2-Y,1/2+Z;<sup>7</sup>+X,+Y,1+Z;<sup>8</sup>1/2+X,1/2-Y,-1/2+Z

**Table S4. Data on dyes degradation in different systems.**

| Pollutant | Different system                                         | Catalyst dosage (g/L) | PMS dosage (g/L) | K (min <sup>-1</sup> ) | Degradation time (min) | Degradation efficiency (%) |
|-----------|----------------------------------------------------------|-----------------------|------------------|------------------------|------------------------|----------------------------|
| MO        | CUST-565 only                                            | 0.16                  | 0                | 0.0002                 | 30                     | 0                          |
|           | PMS only                                                 | 0                     | 0.12             | 0.0674                 | 30                     | 86                         |
|           | CUST-565+PMS                                             | 0.16                  | 0.12             | 0.1220                 | 30                     | 97                         |
|           | Co(NO <sub>3</sub> ) <sub>2</sub> •6H <sub>2</sub> O+PMS | 0.16                  | 0.12             | 0.7146                 | 6                      | 99                         |
| RhB       | CUST-565 only                                            | 0.16                  | 0                | 0.0007                 | 30                     | 0                          |
|           | PMS only                                                 | 0                     | 0.12             | 0.0251                 | 30                     | 53                         |
|           | CUST-565+PMS                                             | 0.16                  | 0.12             | 0.1312                 | 30                     | 98                         |
|           | Co(NO <sub>3</sub> ) <sub>2</sub> •6H <sub>2</sub> O+PMS | 0.16                  | 0.12             | 1.1526                 | 6                      | 100                        |

**Table S5. Comparison of the effect of molar ratio between CUST-565, PMS, and MO on degradation efficiency.**

| Pollutant | CUST-565 (Molar amount/mmol) | PMS (Molar amount/mmol) | CUST-565 : PMS (Molar ratio) | CUST-565 : PMS : MO (Molar ratio) | Degradation efficiency(%) |
|-----------|------------------------------|-------------------------|------------------------------|-----------------------------------|---------------------------|
| MO        | 0.001323                     | 0.009760                | 0.1356                       | 0.1356 : 1 : 0.1956               | 89.99                     |
| 0.625mg=  | 0.001984                     | 0.009760                | 0.2033                       | 0.2033 : 1 : 0.1956               | 97.42                     |
| 0.001909  | 0.002646                     | 0.009760                | 0.2711                       | 0.2711 : 1 : 0.1956               | 97.64                     |
| mmol      | 0.003307                     | 0.009760                | 0.3388                       | 0.3388 : 1 : 0.1956               | 96.57                     |
|           | 0.002646                     | 0.006517                | 0.4060                       | 0.4060 : 1 : 0.2929               | 82.97                     |
|           | 0.002646                     | 0.009760                | 0.2711                       | 0.2711 : 1 : 0.1956               | 97.42                     |
|           | 0.002646                     | 0.013013                | 0.2033                       | 0.2033 : 1 : 0.1467               | 97.14                     |
|           | 0.002646                     | 0.016267                | 0.1627                       | 0.1627 : 1 : 0.1174               | 96.81                     |

**Table S6.** Comparison of the effect of molar ratio between **CUST-565**, PMS, and RhB on degradation efficiency.

| Pollutant                    | CUST-565<br>(Molar<br>amount/mmol) | PMS<br>(Molar<br>amount/mmol) | CUST-565 :<br>PMS<br>(Molar ratio) | CUST-565 :<br>PMS : MO<br>(Molar ratio) | Degradation<br>efficiency(%) |
|------------------------------|------------------------------------|-------------------------------|------------------------------------|-----------------------------------------|------------------------------|
| RhB                          | 0.001323                           | 0.009760                      | 0.1356                             | 0.1356 : 1 : 0.1337                     | 57.62                        |
| 0.625mg=<br>0.001305<br>mmol | 0.001984                           | 0.009760                      | 0.2033                             | 0.2033 : 1 : 0.1337                     | 84.83                        |
|                              | 0.002646                           | 0.009760                      | 0.2711                             | 0.2711 : 1 : 0.1337                     | 98.07                        |
|                              | 0.003307                           | 0.009760                      | 0.3388                             | 0.3388 : 1 : 0.1337                     | 97.94                        |
|                              | 0.002646                           | 0.006517                      | 0.4060                             | 0.4060 : 1 : 0.2002                     | 89.55                        |
|                              | 0.002646                           | 0.009760                      | 0.2711                             | 0.2711 : 1 : 0.1337                     | 98.07                        |
|                              | 0.002646                           | 0.013013                      | 0.2033                             | 0.2033 : 1 : 0.1003                     | 99.44                        |
|                              | 0.002646                           | 0.016267                      | 0.1627                             | 0.1627 : 1 : 0.0802                     | 98.87                        |

**Table S7.** Comparison of dyes degradation by **CUST-565** with other catalysts.

| Sample                                                                                                              | Catalyst<br>dosage<br>(mg) | Dyes | Dyes<br>concentration<br>(mg/L) | Volume<br>(mL) | Time<br>(min) | Removal<br>Efficiency<br>(%) | Ref.         |
|---------------------------------------------------------------------------------------------------------------------|----------------------------|------|---------------------------------|----------------|---------------|------------------------------|--------------|
| Ag-Ce/ZnO                                                                                                           | 30                         | RhB  | 10                              | 120            | 30            | 97                           | 1            |
| [Cd(NiL)(PTA)]DM<br>AC <sub>3</sub>                                                                                 | -                          | MO   | 20                              | 50             | 240           | 85                           | 2            |
| {(Cu <sub>5</sub> Br <sub>6</sub> )(Cu <sub>6</sub> Br <sub>9</sub> )[<br>Cu <sub>3</sub> Br(TTTMB) <sub>2</sub> ]} | 5                          | MO   | 10                              | 40             | 150           | ~90                          | 3            |
| CC-10/CN                                                                                                            | 25                         | MO   | 40                              | 50             | 35            | 97                           | 4            |
| ZnO/gC <sub>3</sub> N <sub>4</sub> -ZCN                                                                             | 50                         | MO   | 10                              | 50             | 180           | 57.7                         | 5            |
| CuO/Cu <sub>2</sub> O                                                                                               | 40                         | MO   | 5                               | 50             | 240           | 60                           | 6            |
| 7wt%Co@ZnSQDs/<br>gC <sub>3</sub> N <sub>4</sub> /MWCNT                                                             | 280                        | RhB  | 10                              | 220            | 75            | 96                           | 7            |
| SDS-(Zn-SnO <sub>2</sub> )                                                                                          | 100                        | RhB  | -                               | 50             | 100           | 90                           | 8            |
| [Co <sub>3</sub> (BTB) <sub>2</sub> (BIPY) <sub>2</sub> ]<br>•4.5H <sub>2</sub> O•DMA                               | 3                          | MO   | 20                              | 25             | 30            | 98                           | This<br>work |
| [Co <sub>3</sub> (BTB) <sub>2</sub> (BIPY) <sub>2</sub> ]<br>•4.5H <sub>2</sub> O•DMA                               | 3                          | RhB  | 20                              | 25             | 30            | 97                           | This<br>work |

## References

- 1 R. Liu, X. Fu, Y. Guo, J. Zhang and W. Tian, *Vacuum*, 2023, **215**, 112337.
- 2 L.-Q. Zuo, T.-F. Zhang, Z.-K. Zhang, J.-X. Hou, G.-J. Liu, J.-L. Du and L.-J. Li, *Inorg. Chem. Commun.*, 2019, **99**, 113–118.
- 3 Z.-Y. Zhang, G.-D. Zhang, X.-X. Sheng, Q.-W. Ding, Y.-Z. Bai, Y. Su, H.-K. Liu

- and Z. Su, *Cryst Growth Des.*, 2021, **1**, 333–343.
- 4R. Xu, J. Li, G. Sui, Y. Zhuang, D. Guo, Z. Luo, S. Liang, H. Yao and C. Wang, *Colloids Surf. Physicochem. Eng. Asp.*, 2023, **659**, 130598.
- 5H. An, L. M. Huong, N. M. Dat, N. D. Hai, C. Q. Cong, N. T. H. Nam, L. T. Tai, D. N. M. Thi, H. B. Nghi, N. T. T. Huyen, D. T. Y. Oanh, M. T. Phong and N. H. Hieu, *Diam. Relat. Mater.*, 2023, **131**, 109583.
- 6F. Tavakoli Joorabi, M. Kamali and S. Sheibani, *Mater. Sci. Semicond. Process.*, 2022, **139**, 106335.
- 7M. Danish and M. Muneer, *Ceram. Int.*, 2021, **47**, 13043–13056.
- 8Sp. Keerthana, R. Yuvakkumar, G. Ravi, M. Manimegalai, M. Pannipara, A. G. Al-Sehemi, R. A. Gopal, M. M. Hanafiah and D. Velauthapillai, *Environ. Res.*, 2021, **199**, 111312.

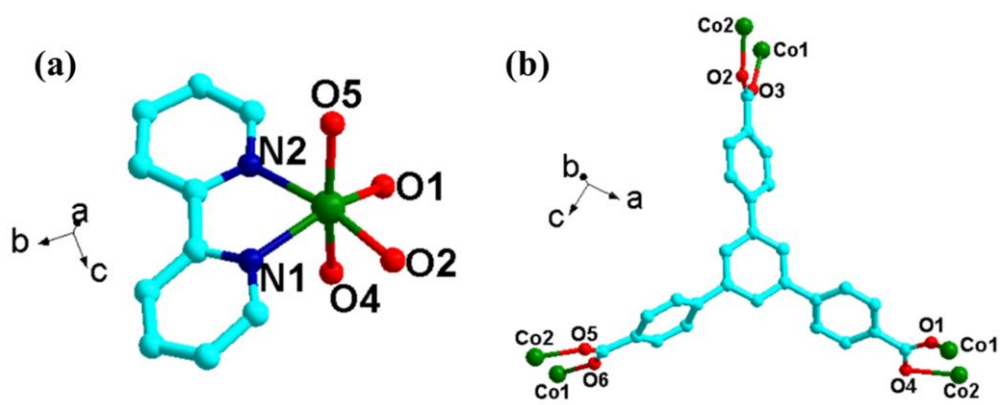

**Fig. S1.** Coordination environment of BIPY ligand and BTB ligand in **CUST-565**.

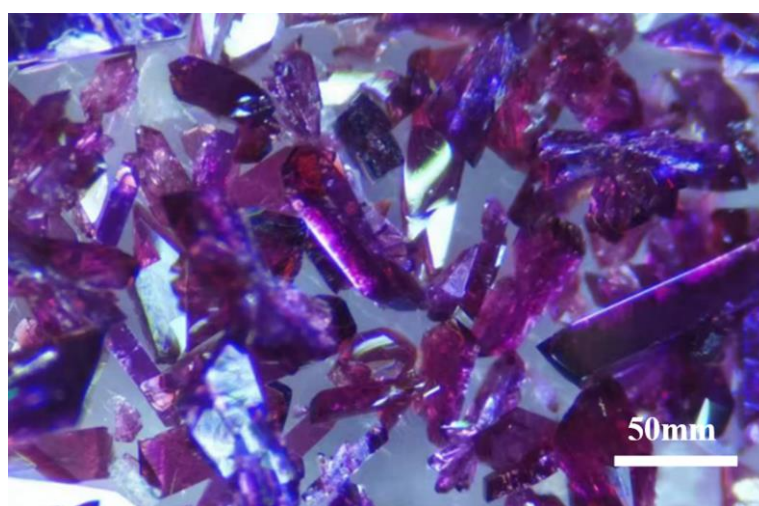

**Fig. S2.** The morphology of the **CUST-565**.



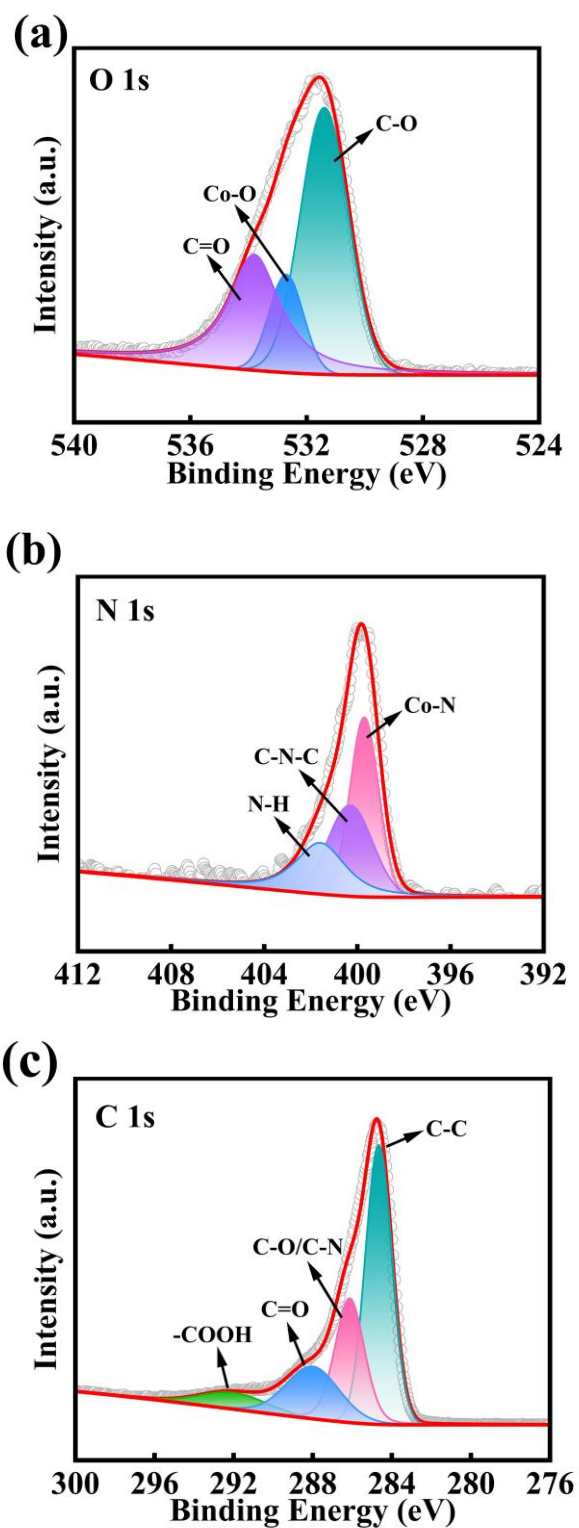

**Fig. S3.** XPS analysis: high-resolution spectra of (a) O 1s;(b) N 1s and (c) C 1s after use of CUST-565.

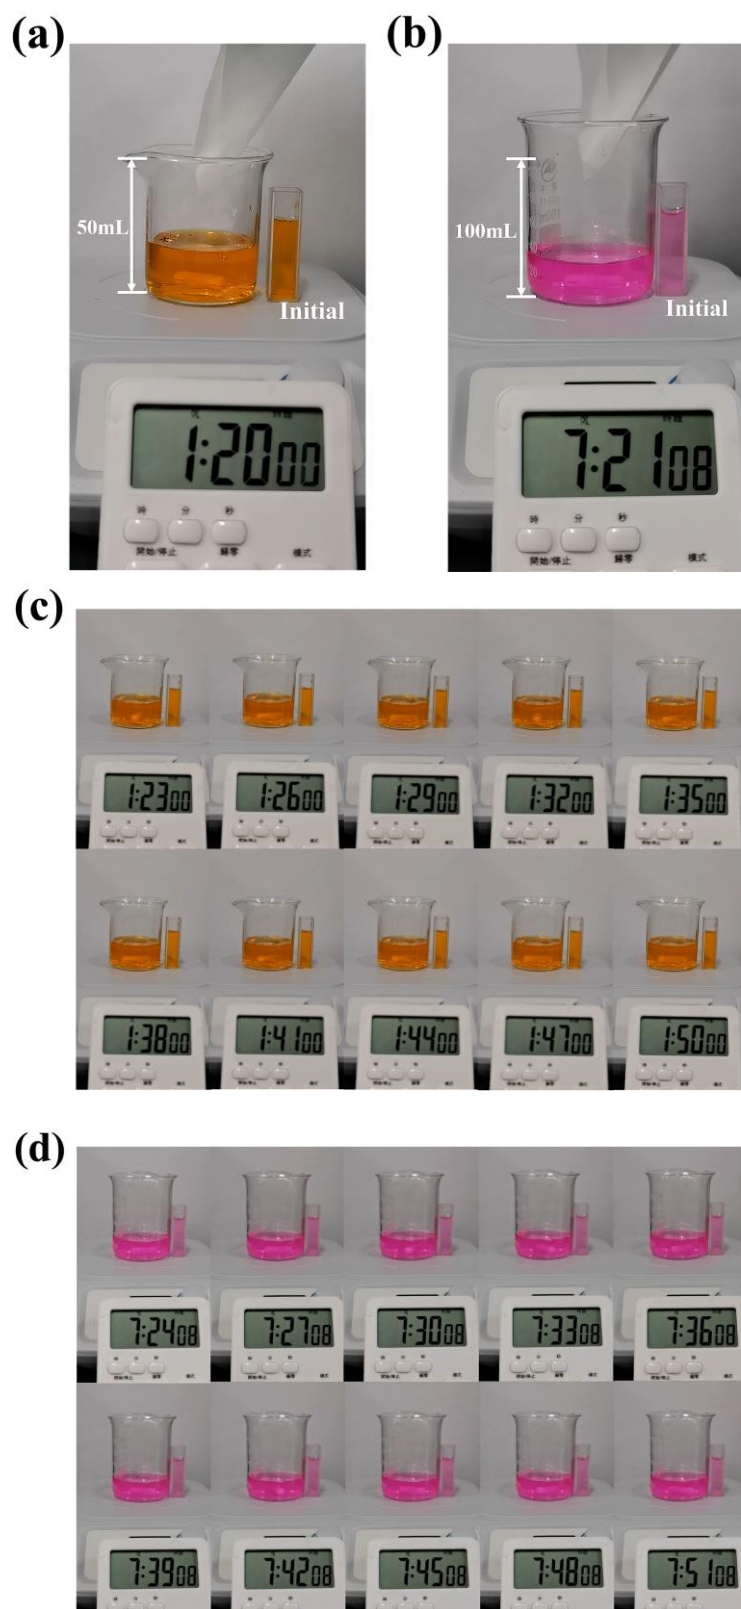

**Fig. S4.** Adsorption experiment showing (a) initial MO solution;(b) initial RhB solution and (c) MO solutions at three minutes intervals and (d) RhB solutions at three minutes intervals.

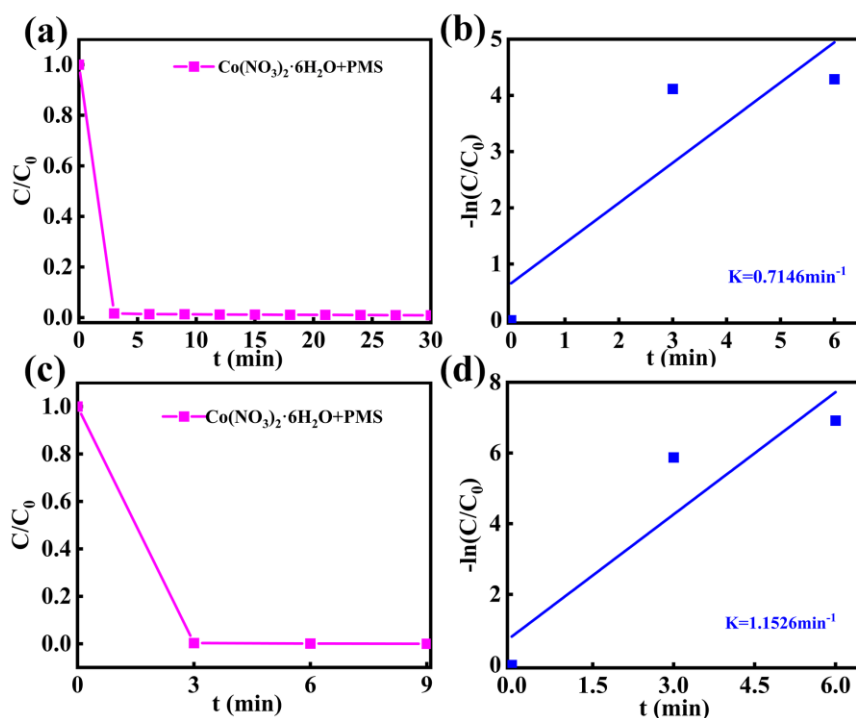

**Fig. S5.** (a) Degradation efficiency of MO; (b) Kinetic fitting curve of MO; (c) Degradation efficiency of RhB; (d) Kinetic fitting curve of RhB.  $[MO]=[RhB]=20\text{mg/L}$ ,  $[PMS]=0.12\text{g/L}$ ,  $[Co(NO_3)_2 \cdot 6H_2O]=0.16\text{g/L}$ .

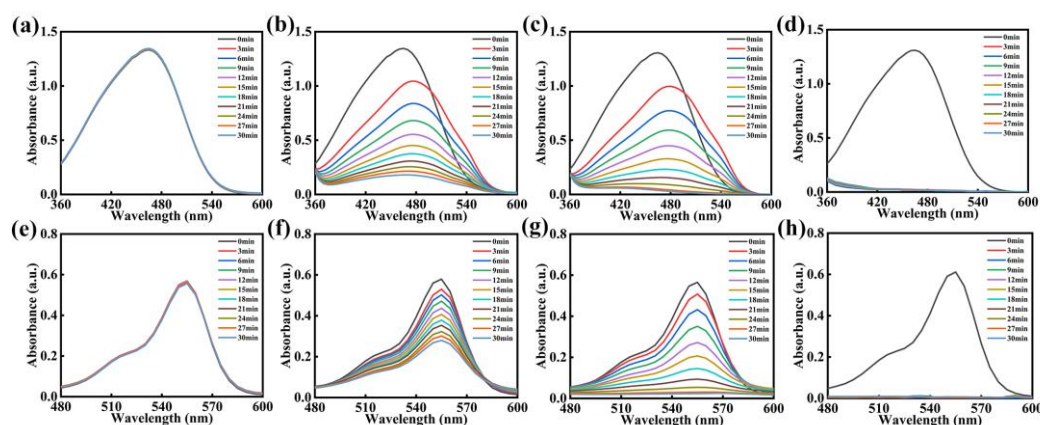

**Fig. S6.** UV spectrum of MO degradation in different systems (a) **CUST-565** only; (b) **PMS** only; (c) **CUST-565** and **PMS**; (d) **Co(NO<sub>3</sub>)<sub>2</sub>•6H<sub>2</sub>O** and **PMS**. UV spectrum of RhB degradation in different systems (e) **CUST-565** only; (f) **PMS** only; (g) **CUST-565** and **PMS**; (h) **Co(NO<sub>3</sub>)<sub>2</sub>•6H<sub>2</sub>O** and **PMS**.

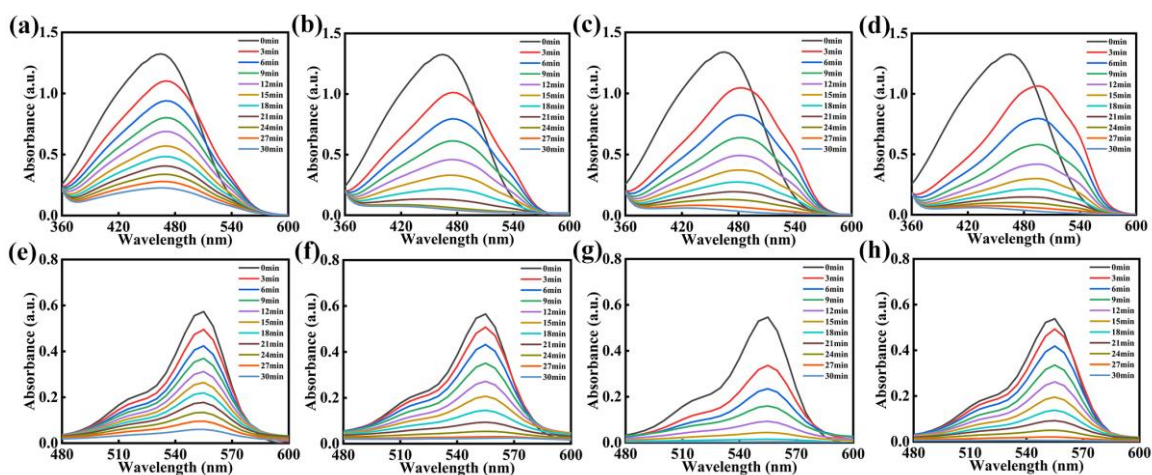

**Fig. S7.** UV spectrum of effect of catalyst dosage on MO degradation (a) 0.08 g/L; (b) 0.12 g/L; (c) 0.16 g/L; (d) 0.20 g/L. UV spectrum of effect of catalyst dosage on RhB degradation (e) 0.08 g/L; (f) 0.12 g/L; (g) 0.16 g/L; (h) 0.20 g/L.

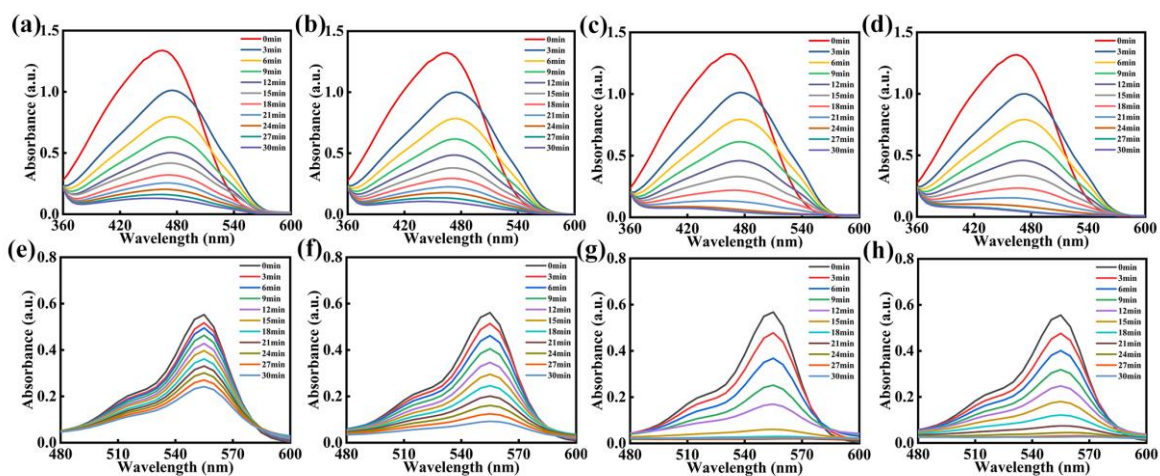

**Fig. S8.** UV spectrum of effect of PMS dosage on MO degradation (a) 0.08 g/L; (b) 0.12 g/L; (c) 0.16 g/L; (d) 0.20 g/L. UV spectrum of effect of PMS dosage on RhB degradation (e) 0.08 g/L; (f) 0.12 g/L; (g) 0.16 g/L; (h) 0.20 g/L.

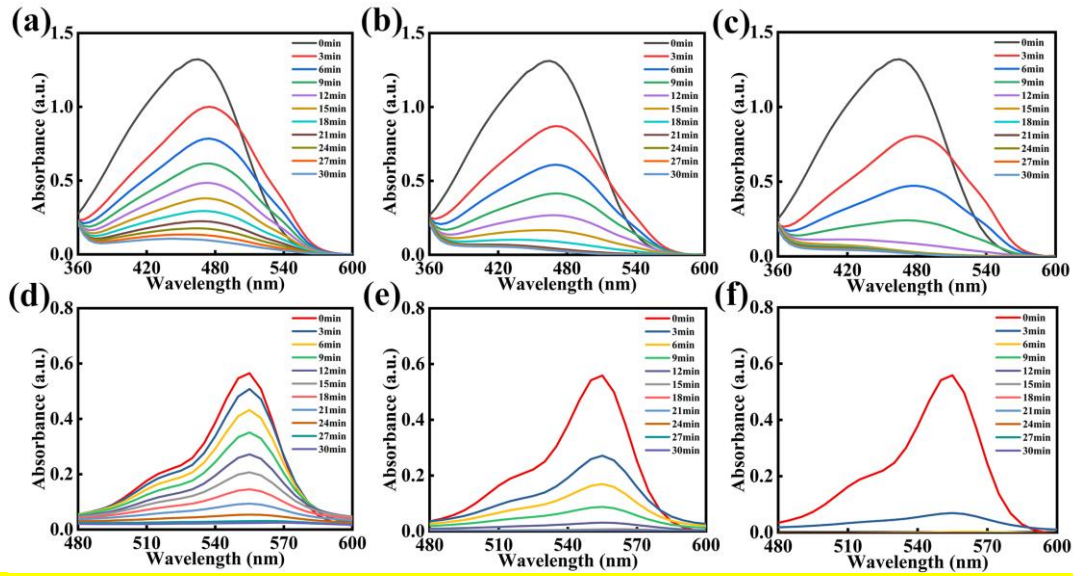

**Fig. S9.** UV spectrum of effect of temperature on MO degradation (a) 20°C; (b) 40°C; (c) 50°C; Effect of temperature on RhB degradation (d) 20°C; (e) 40°C; (f) 50°C.

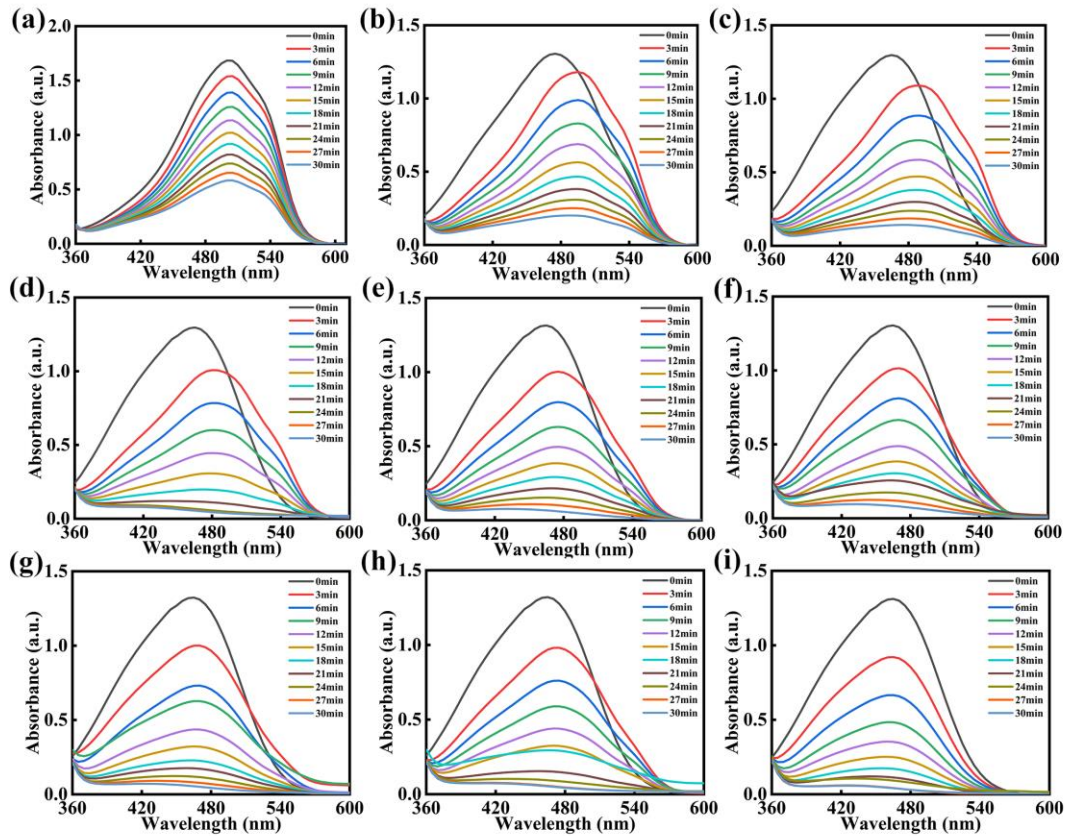

**Fig. S10.** UV spectrum of effect of pH on MO degradation (a) pH3; (b) pH4; (c) pH5; (d) pH6; (e) pH7; (f) pH8; (g) pH9; (h) pH10; (i) pH11.

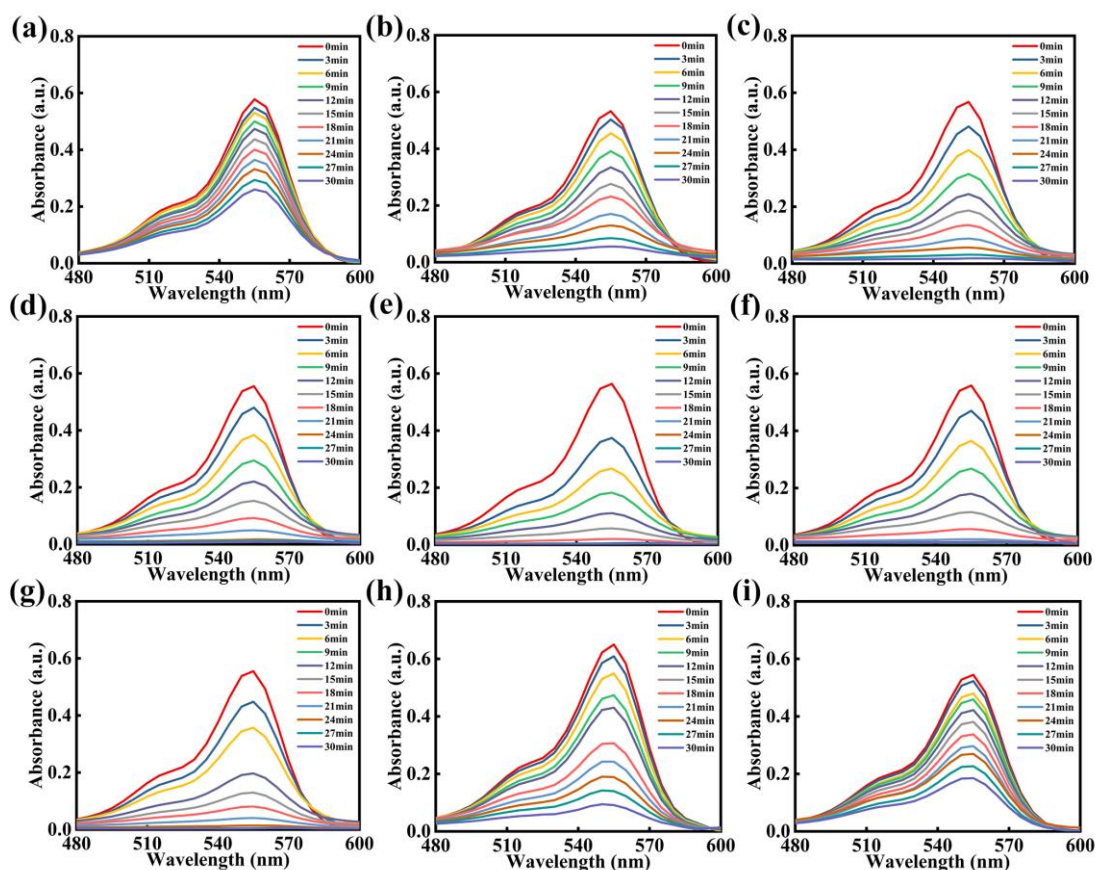

**Fig. S11.** UV spectrum of effect of pH on RhB degradation (a) pH3; (b) pH4; (c) pH5; (d) pH6; (e) pH7; (f) pH8; (g) pH9; (h) pH10; (i) pH11.

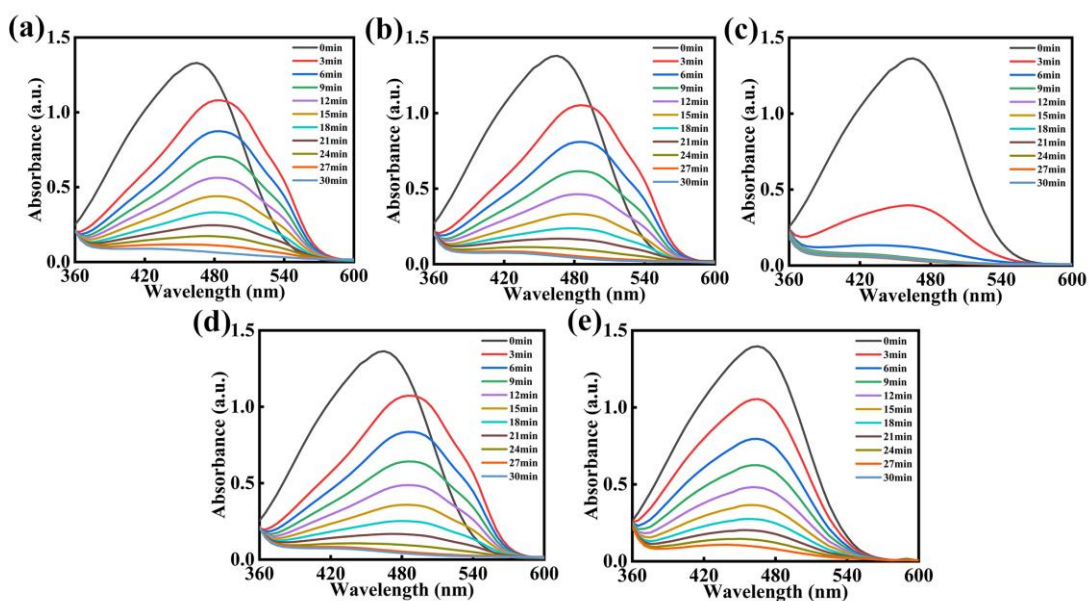

**Fig. S12.** UV spectrum of effect of different inorganic anions on MO degradation (a) NaCl; (b)  $\text{NaH}_2\text{PO}_4$ ; (c)  $\text{NaHCO}_3$ ; (d)  $\text{Na}_2\text{SO}_4$ ; (e)  $\text{Na}_2\text{CO}_3$ .

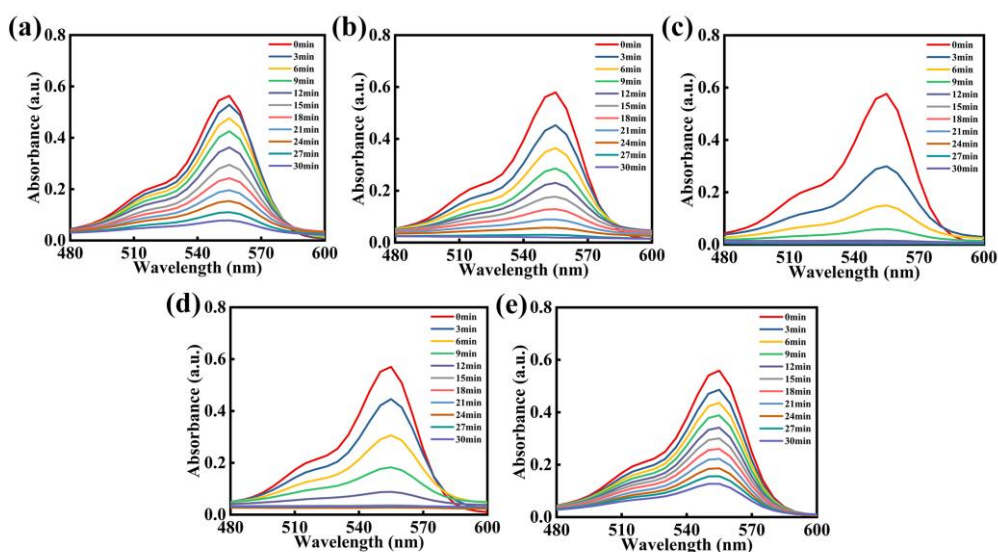

**Fig. S13.** UV spectrum of effect of different inorganic anions on RhB degradation (a) NaCl; (b)  $\text{NaH}_2\text{PO}_4$ ; (c)  $\text{NaHCO}_3$ ; (d)  $\text{Na}_2\text{SO}_4$ ; (e)  $\text{Na}_2\text{CO}_3$ .

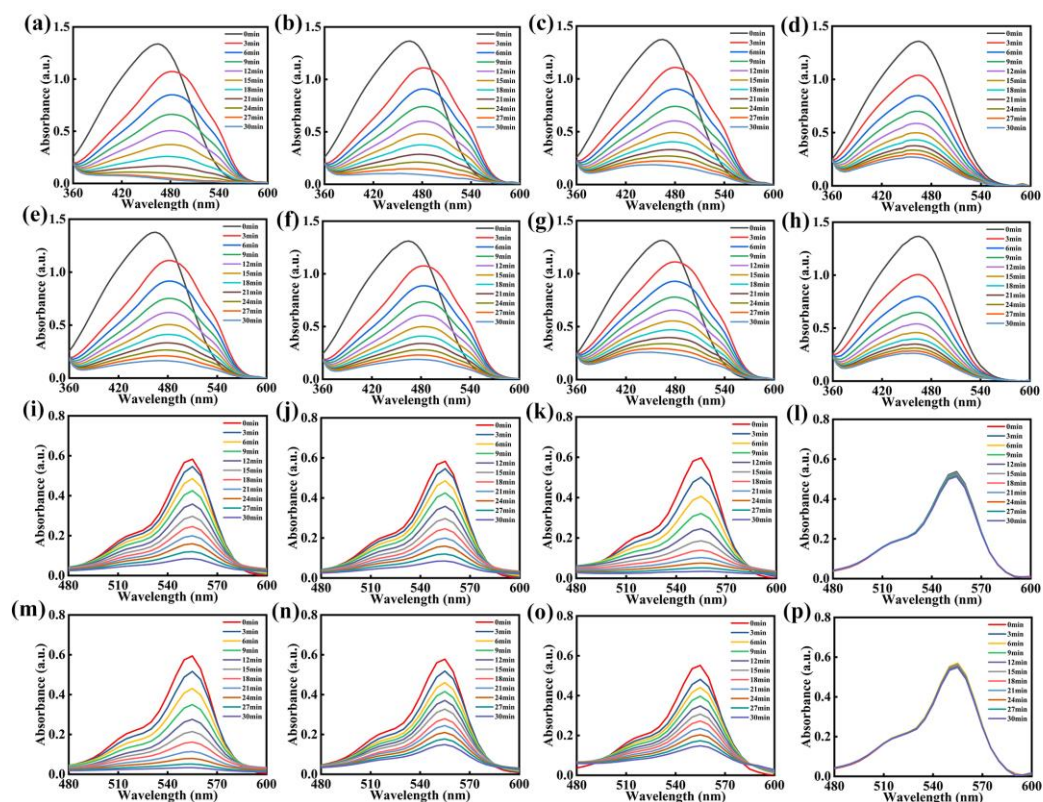

**Fig. S14.** UV spectrum of effect of different concentrations of quenchers on MO degradation (a) MeOH(100 : 1); (b) TBA(100 : 1); (c) P-BQ(5 : 1); (d) L-His(5 : 1); (e) MeOH(500 : 1); (f) TBA(500 : 1); (g) P-BQ(10 : 1); (h) L-His(10 : 1). UV spectrum-Effect of different concentrations of quenchers on RhB degradation (i) MeOH(100 : 1); (j) TBA(100 : 1); (k) P-BQ(5 : 1); (l) L-His(5 : 1); (m) MeOH(500 : 1); (n) TBA(500 : 1); (o) P-BQ(10 : 1); (p) L-His(10 : 1).

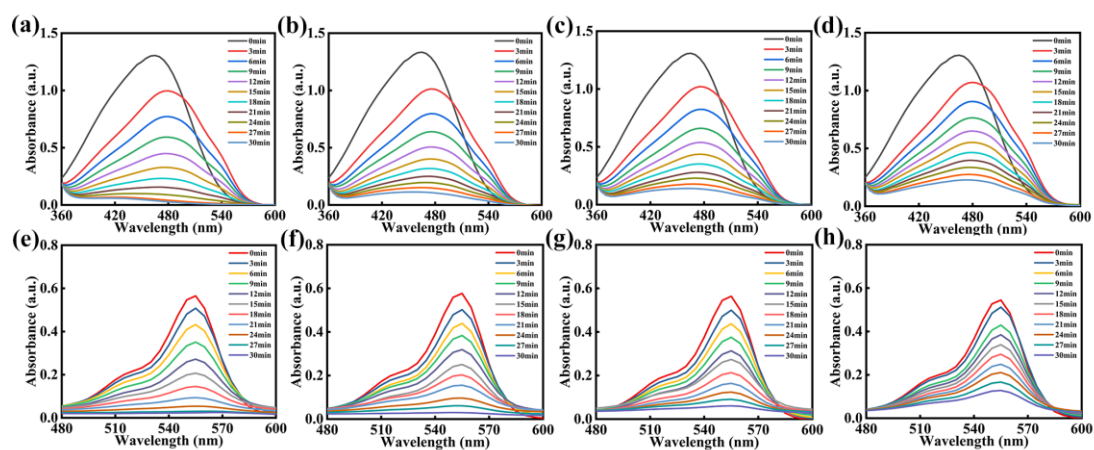

**Fig. S15.** UV spectrum of the reusability of CUST-565 in the degradation of MO (a) 1; (b) 2; (c) 3; (d) 4 cycles. UV spectrum of the reusability of CUST-565 in the degradation of RhB (e) 1; (f) 2; (g) 3; (h) 4 cycles.

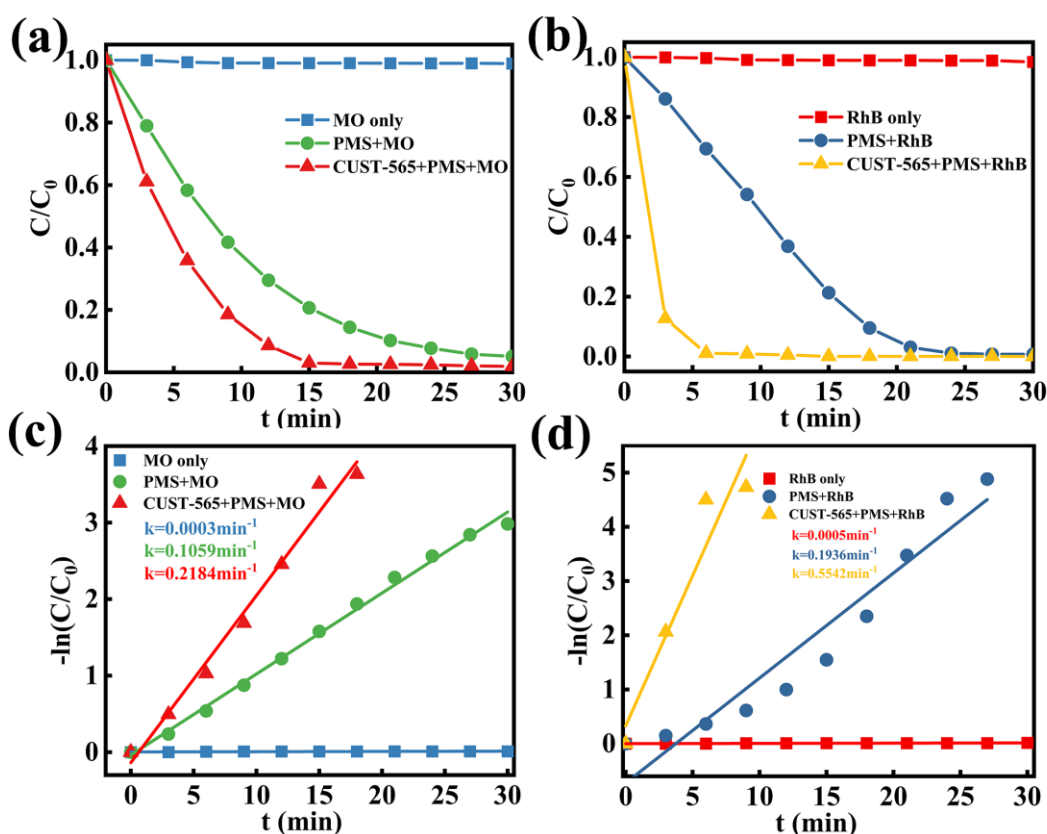

**Fig. S16.** (a) Degradation efficiency of MO in different systems at 50°C; (b) Kinetic fitting curves of MO; (c) Degradation efficiency of RhB in different systems at 50°C; (d) Kinetic fitting curves of RhB.



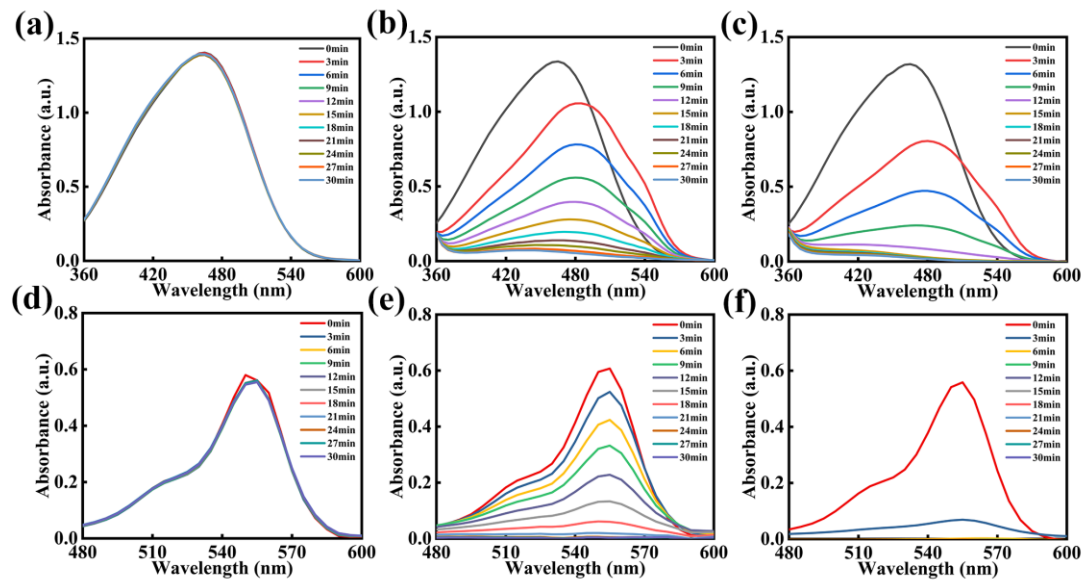

**Fig. S17.** UV spectrum of degradation efficiency of MO in different systems at 50°C (a) MO only; (b) PMS and MO; (c) CUST-565, PMS, and MO; Degradation efficiency of RhB in different systems at 50°C (d) RhB only; (e) PMS and RhB; (f) CUST-565, PMS, and RhB.

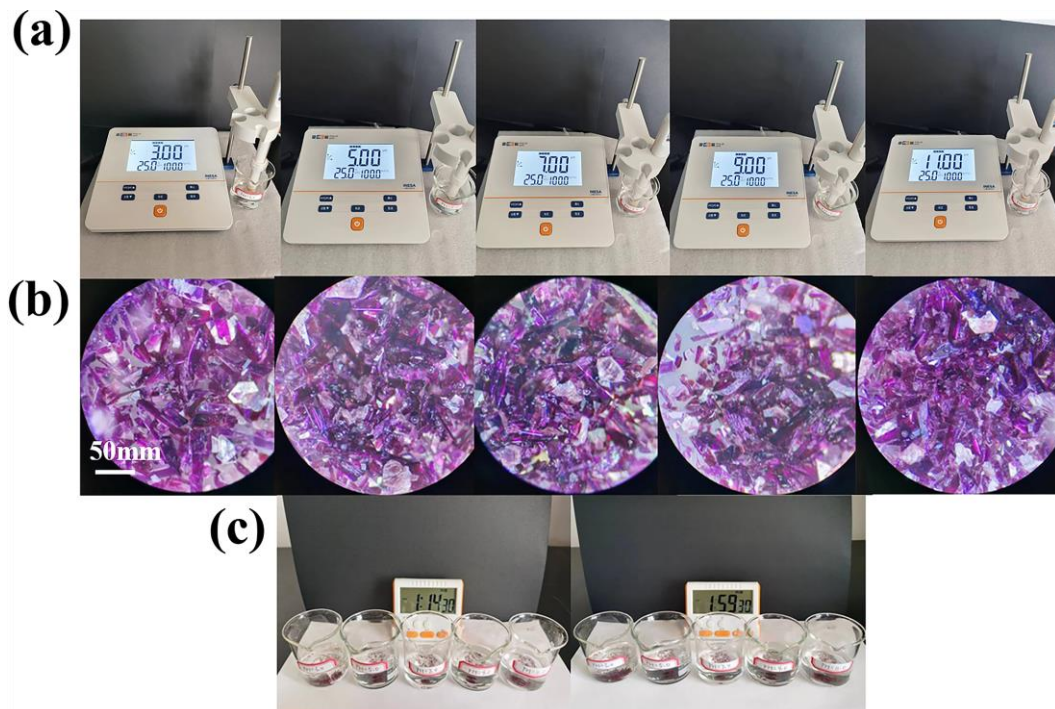

**Fig. S18.** (a) Different pH aqueous solutions; (b) The morphology of the CUST-565 after 45 min soaking in different pH aqueous solution; (c) The picture of CUST-565 soaking time.

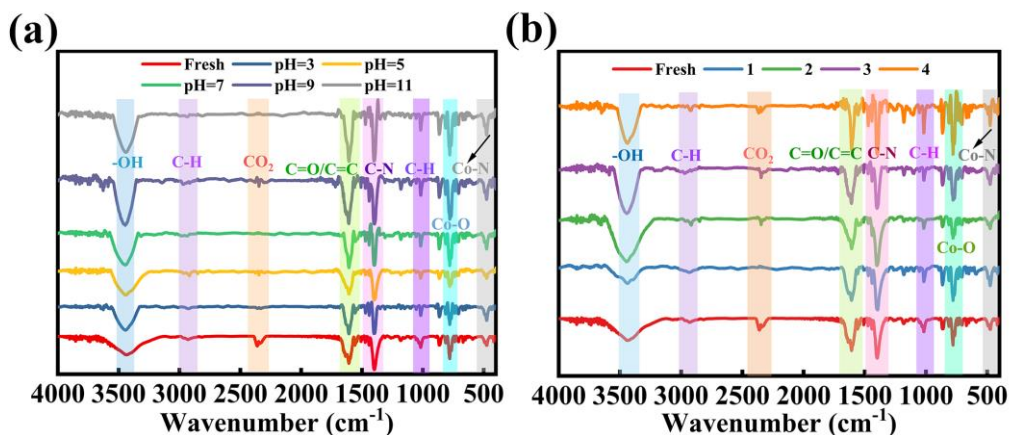

**Fig. S19.** (a) FTIR spectra of CUST-565 in different pH aqueous solutions; (b) FTIR spectra of CUST-565 with different number of usage (cycle).

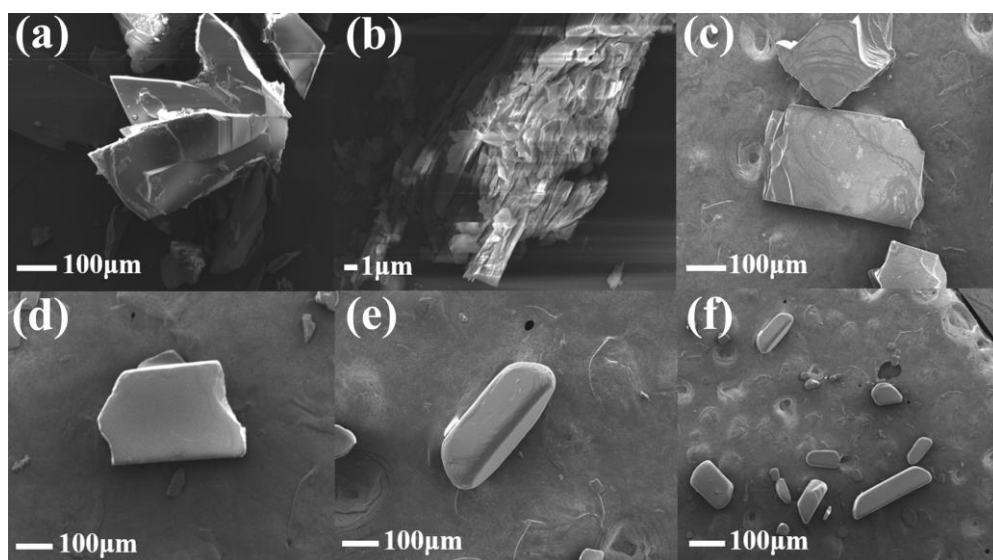

**Fig. S20.** SEM images of CUST-565 (a), (b) Fresh; (c) Once usage; (d) Twice usage; (e) Thrice usage; (f) Four times usage.

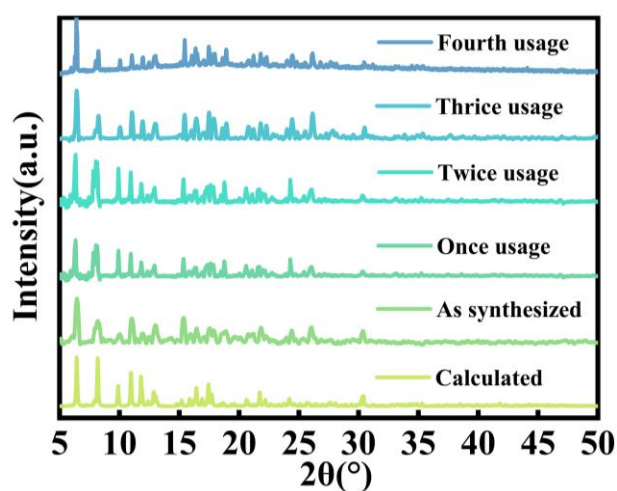

**Fig. S21.** XRD pattern of CUST-565 before and after usage.

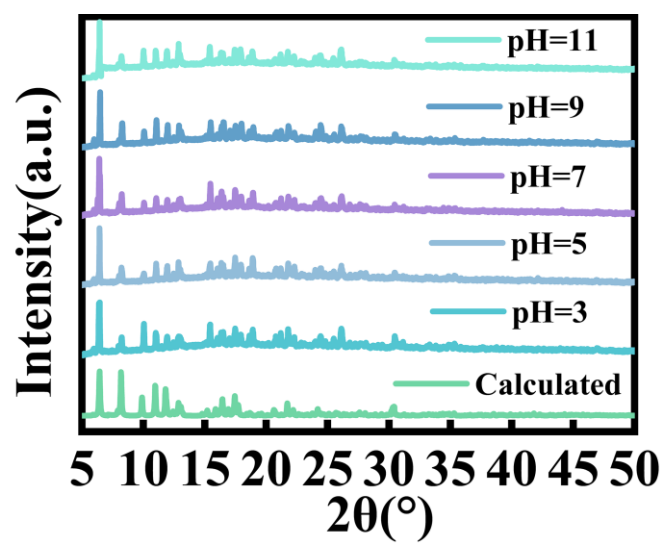

**Fig. S22.** XRD pattern of CUST-565 in different pH H<sub>2</sub>O.
